# Supplementary material
Source: Springer Nature journal article supplement (https://www.springermedizin.de/resource/supplementary/13018_2010_243_MOESM4_ESM.pdf/9636740)
Supplement: MOESM4 [file 9636740]

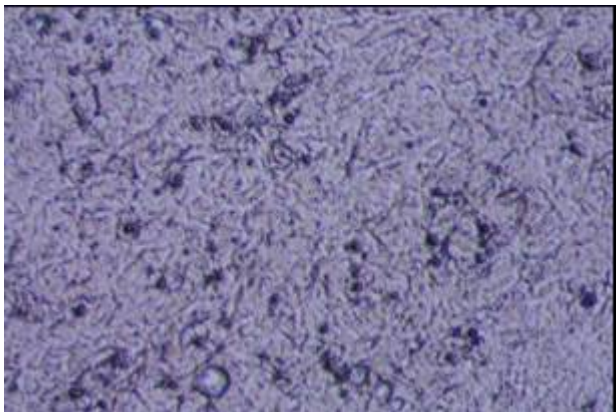

5% Normal Media

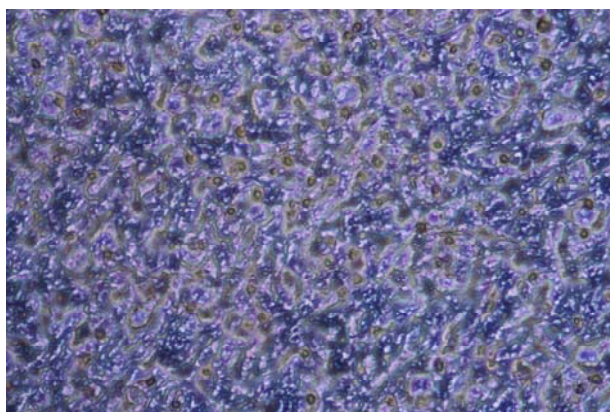

5% Normal Media + 5ng/ml FGF-2

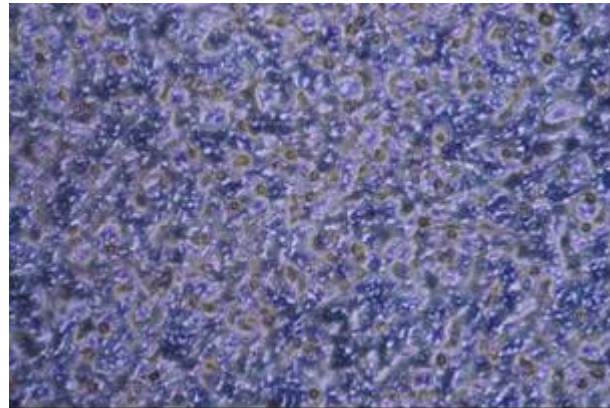

5% Normal Media + 50ng/ml BMP-2

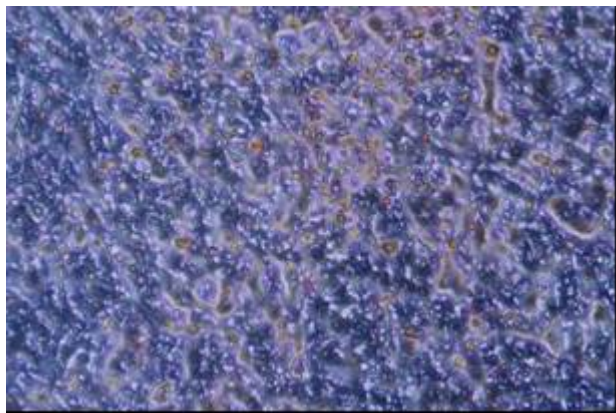

5% Mineralizing Media

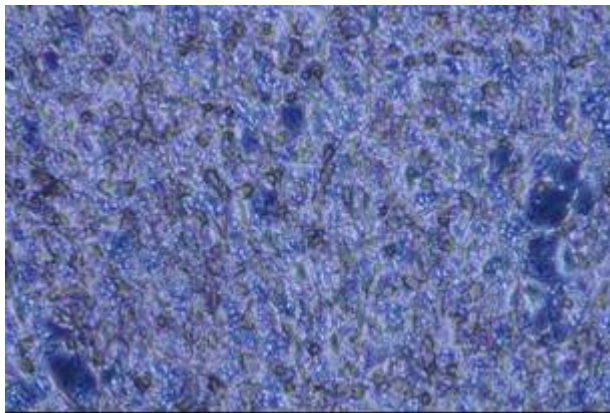

5% Mineralizing Media + 5ng/ml FGF-2

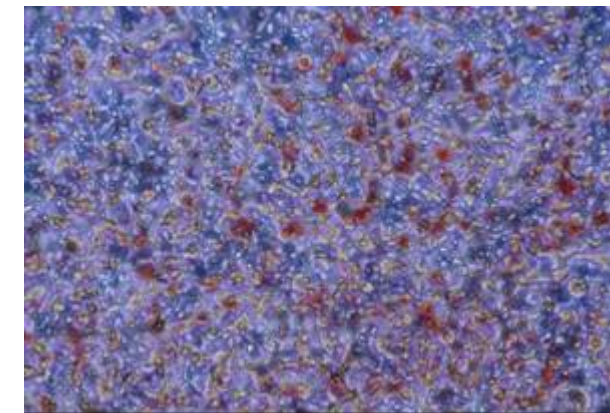

5% Mineralizing Media + 50ng/ml BMP-2
